# Supplementary material for: Measuring the burden of hundreds of BioBricks defines an evolutionary limit on constructability in synthetic biology
Source: PubMed Central journal article supplement (PMC11269670; doi:10.1038/s41467-024-50639-9), 2024-07-24
Supplement: 41467_2024_50639_MOESM2_ESM.pdf [file 41467_2024_50639_MOESM2_ESM.pdf]

**Supplementary Data 1. Cell divisions during culture scale-up.** Calculations used to estimate how many cell divisions occur during growth from a single engineered cell to a colony and then to cultures used at different laboratory and industrial scales.

**Supplementary Data 2. BioBrick plasmid microplate assays.** Growth rates and GFP production rates fit for every well of the microplate assays.

**Supplementary Data 3. BioBrick plasmid statistics.** Statistics compiled for each BioBrick from the results of all microplate assays and additional information about the BioBricks.

**Supplementary Data 4. BioBrick plasmid sequencing results.** Analysis of Illumina DNA sequencing results used to validate BioBrick plasmids.

**Supplementary Data 5. BFP control and RFP series microplate assays.** Growth rates, GFP production rates, and BFP/RFP production rates fit for every well of the microplate assays.

**Supplementary Data 6. BFP control and RFP series statistics.** Statistics compiled for each plasmid from the results of all microplate assays and additional information about the plasmids.
